# Supplementary material for: The microbiota restrains neurodegenerative microglia in a model of amyotrophic lateral sclerosis
Source: PubMed Central journal article supplement (PMC8915543; doi:10.1186/s40168-022-01232-z), 2022-03-11

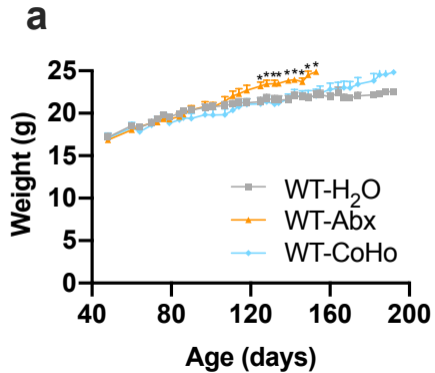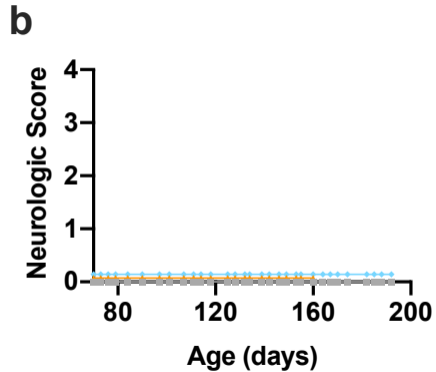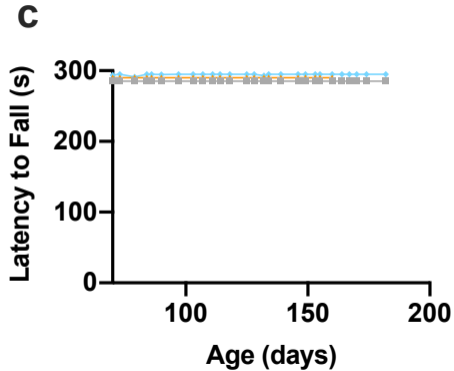

Supplement: 40168_2022_1232_MOESM2_ESM.pdf [file 40168_2022_1232_MOESM2_ESM.pdf]
