# Supplementary material for: The microbiota restrains neurodegenerative microglia in a model of amyotrophic lateral sclerosis
Source: PubMed Central journal article supplement (PMC8915543; doi:10.1186/s40168-022-01232-z), 2022-03-11
Supplement: 40168_2022_1232_MOESM3_ESM.pdf [file 40168_2022_1232_MOESM3_ESM.pdf]

**a** Sort Cohort

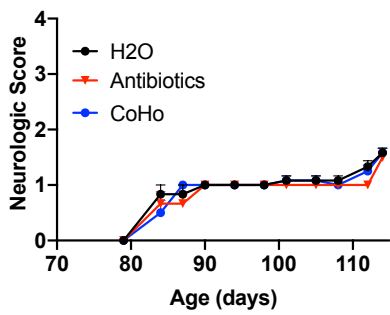

**b** ADONIS test of Unweighted UniFrac

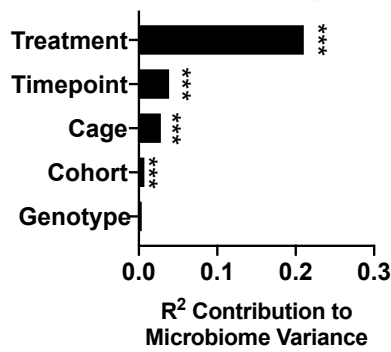

**c** All

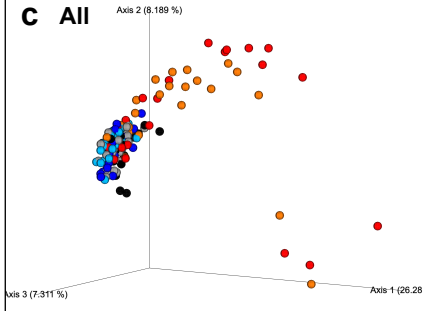

Day 30, Baseline

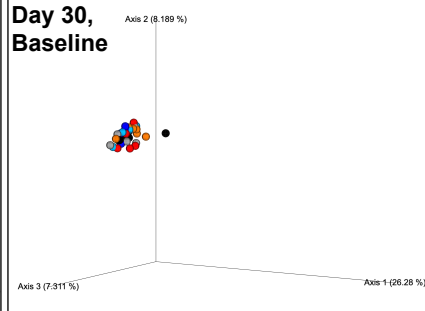

Day 37

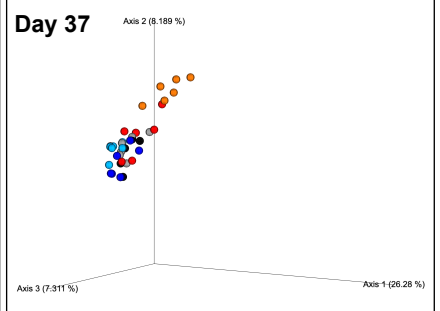

Day 51

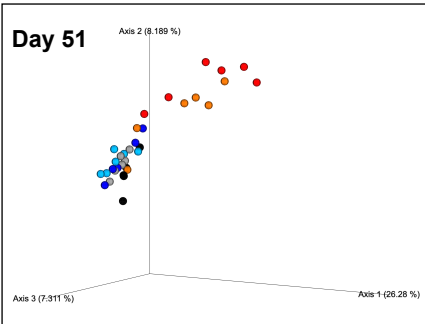

Day 93

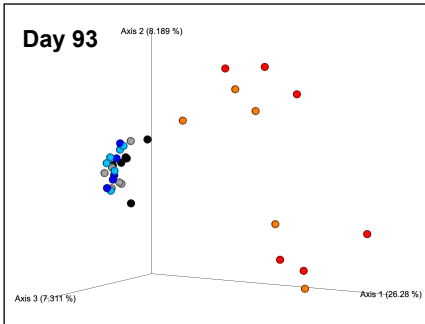

WT-H2O  
 WT-CoHo  
 WT-ABX  
 SOD1-H2O  
 SOD1-CoHo  
 SOD1-ABX

**d**

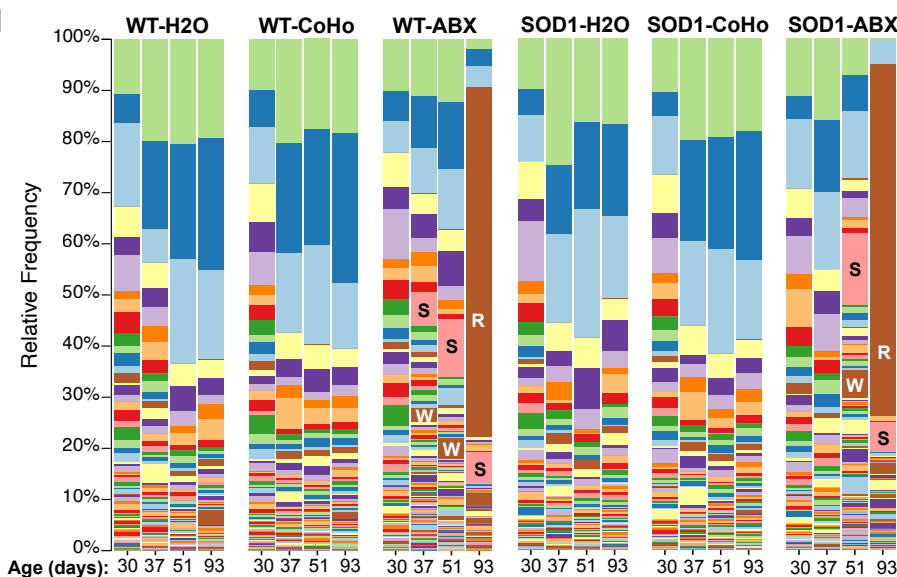

- Muribaculaceae;PAC000186\_g
- Muribaculaceae;PAC001485\_g
- Lactobacillaceae;Lactobacillus
- Ralstonia\_f;Ralstonia
- Muribaculaceae;\_
- Muribaculaceae;PAC001068\_g
- Lachnospiraceae;KE159538\_g
- Muribaculaceae;PAC000198\_g
- Erysipelotrichaceae;Turicibacter
- Lachnospiraceae;PAC000664\_g
- Streptococcaceae;Streptococcus
- S
- Muribaculaceae;EF099060\_g
- Ruminococcaceae;Oscillibacter
- Lachnospiraceae;KE159571\_g
- Clostridiaceae;Clostridium
- Muribaculaceae;PAC001073\_g
- Lachnospiraceae;PAC000692\_g
- Ruminococcaceae;PAC000661\_g
- Ruminococcaceae;Pseudoflavonifractor
- Erysipelotrichaceae;Faecalibaculum
- Lachnospiraceae;Clostridium\_g24
- Lachnospiraceae;LLKB\_g
- Lachnospiraceae;PAC001091\_g
- Lachnospiraceae;Roseburia
- Lachnospiraceae;Clostridium\_g21
- PAC001057\_o;PAC000197\_f
- Lachnospiraceae;PAC001092\_g
- W
- Leuconostocaceae;Weissella
- Ruminococcaceae;Caproiciproducens
- Peptostreptococcaceae;Romboutsia
- Ruminococcaceae;Ruminococcus
